# Supplementary material for: The dynamic dimer structure of the chaperone Trigger Factor
Source: PubMed Central journal article supplement (PMC5722895; doi:10.1038/s41467-017-02196-7), 2017-12-08
Supplement: 41467_2017_2196_MOESM1_ESM.pdf [file 41467_2017_2196_MOESM1_ESM.pdf]

Supplementary Figures

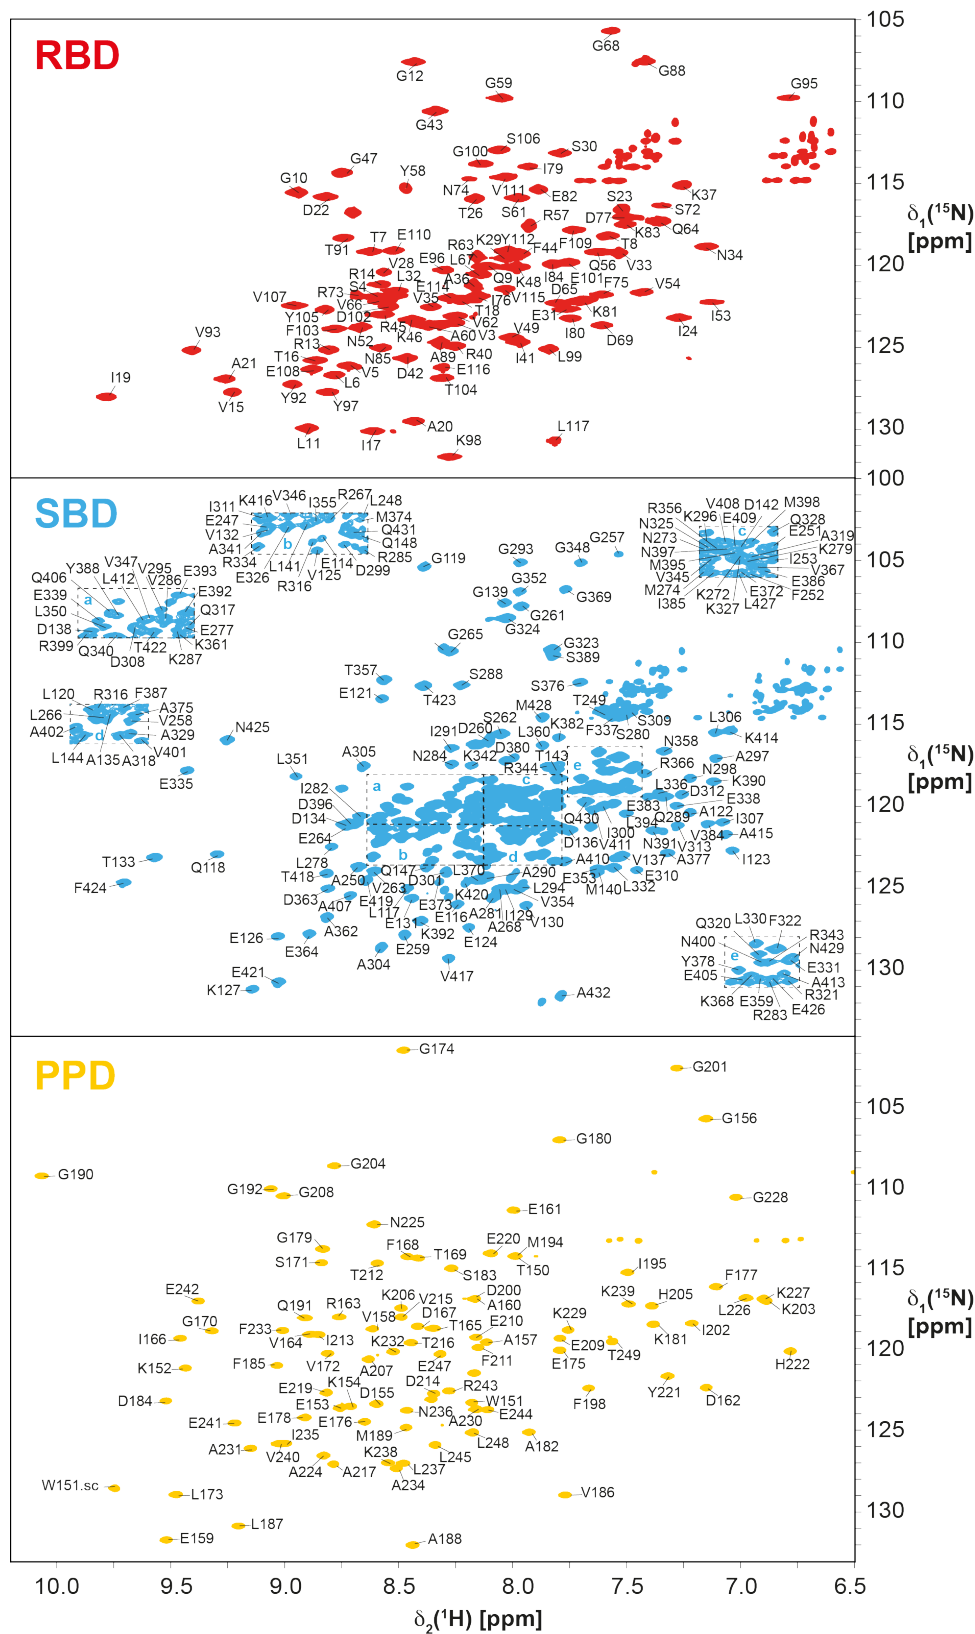

**Supplementary Figure 1 | Sequence-specific resonance assignment of TF domain constructs.** 2D [ $^{15}\text{N}$ ,  $^1\text{H}$ ]-TROSY spectrum of 100  $\mu\text{M}$  [ $U\text{-}^{15}\text{N}$ ] RBD, 250  $\mu\text{M}$  [ $U\text{-}^2\text{H}$ ,  $^{15}\text{N}$ ] SBD, and 100  $\mu\text{M}$  [ $U\text{-}^{15}\text{N}$ ] PPD in sample buffer (20 mM K-phosphate pH 6.5, 100 mM KCl, 0.5 mM EDTA) at 25  $^\circ\text{C}$  and 700 MHz. The sequence-specific resonance assignments were obtained from 3D triple resonance experiments, and confirmed by comparison with published data (BMRB 15813<sup>1</sup> and BMRB 19835–19837<sup>2</sup>).

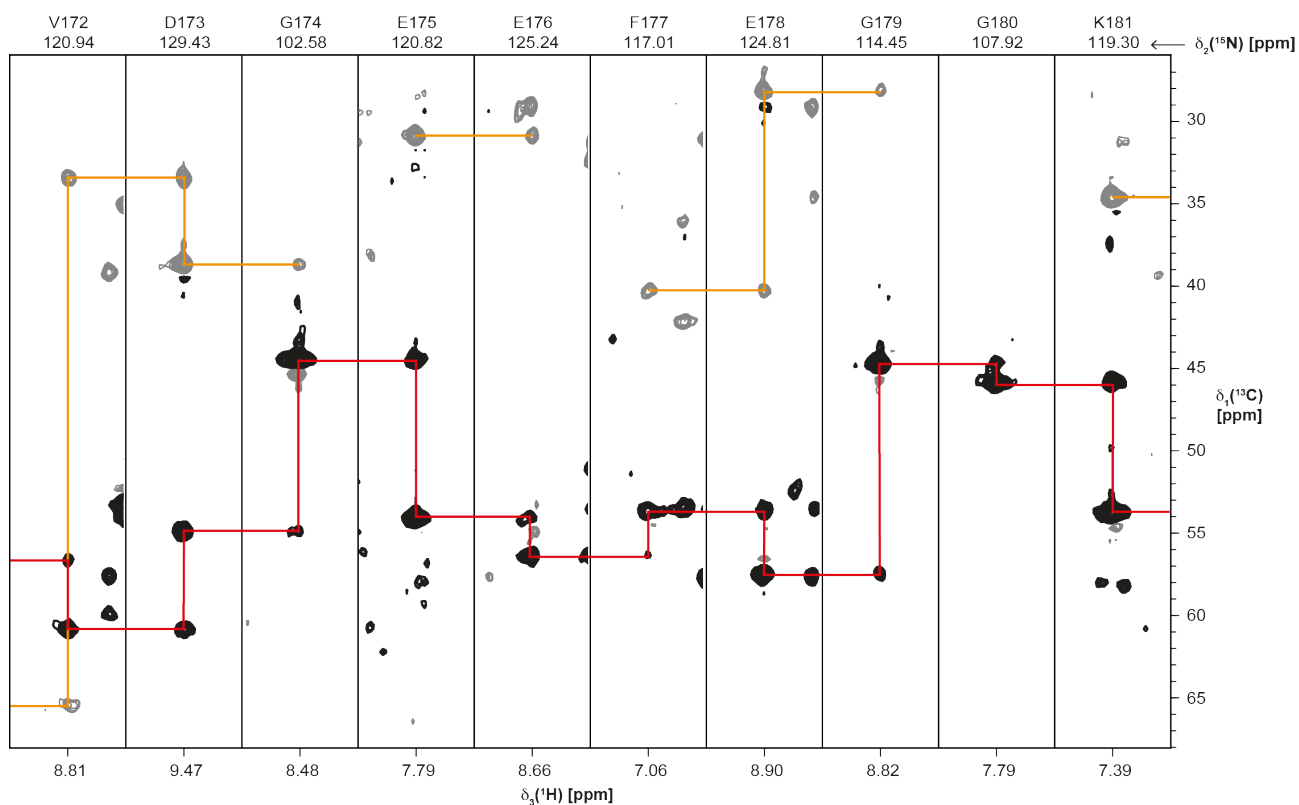

**Supplementary Figure 2 | Backbone NMR assignment of SBD-PPD.** Strips for residues 172–181 from a 3D TROSY-HNCACB experiment for  $[U\text{-}^2\text{H}, ^{15}\text{N}, ^{13}\text{C}]$  SBD-PPD acquired in sample buffer (20 mM K-phosphate pH 6.5, 100 mM KCl, 0.5 mM EDTA) at 25 °C and 700 MHz. The red and orange lines indicate the sequential connection between the strips for  $^{13}\text{C}\alpha$  and  $^{13}\text{C}\beta$  nuclei, respectively.

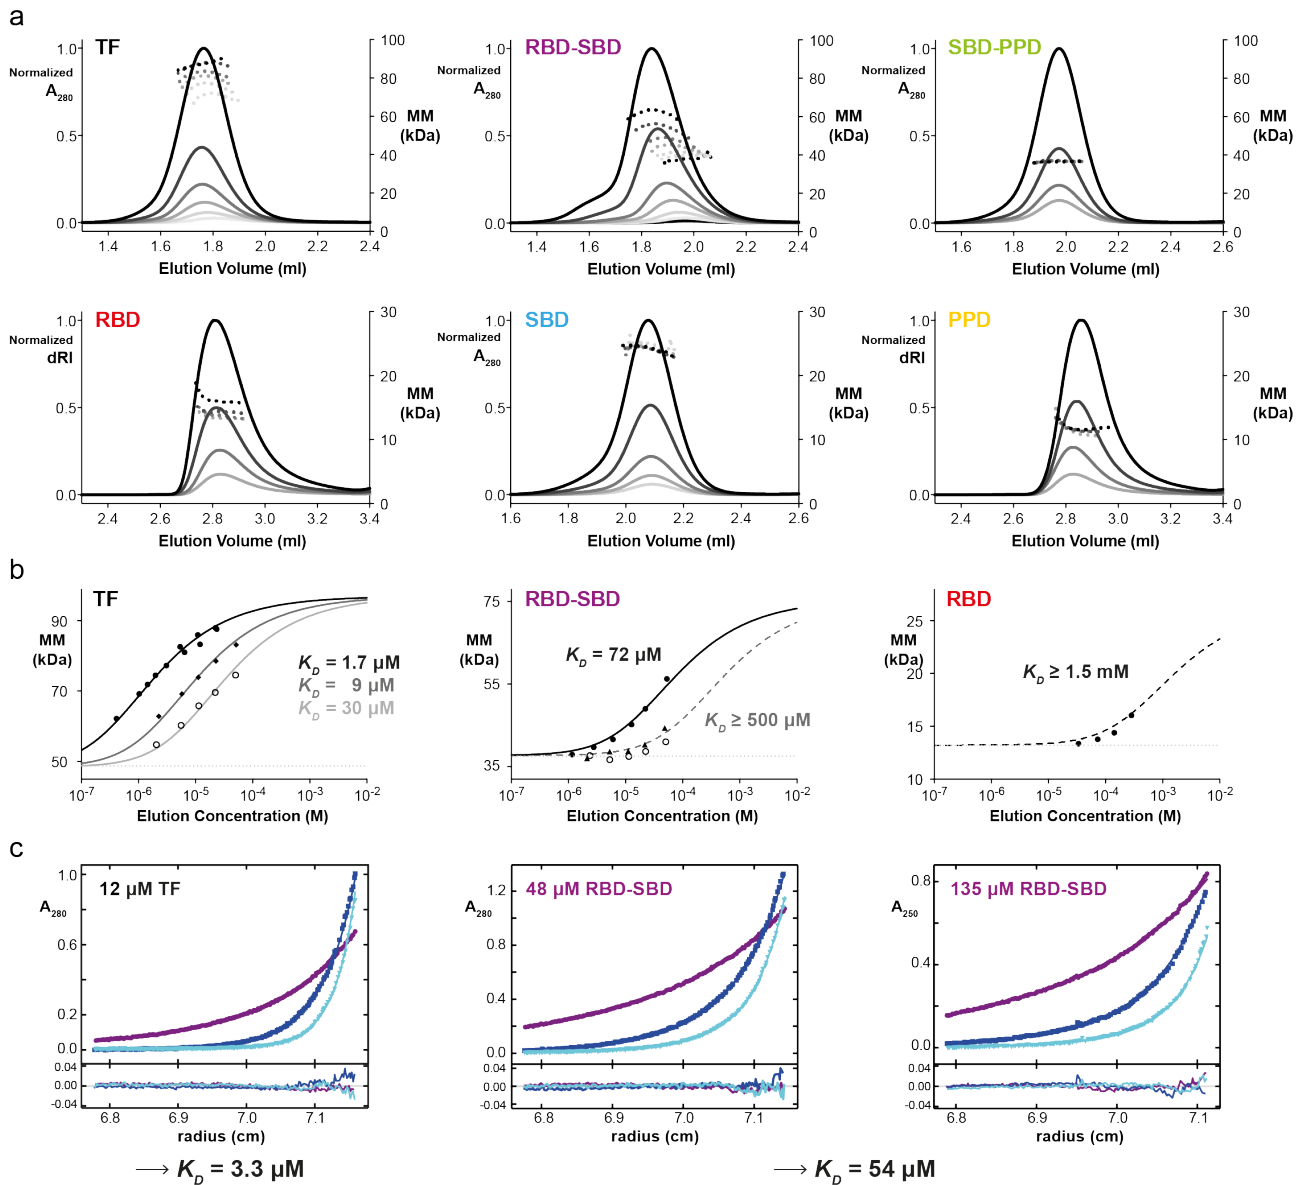

**Supplementary Figure 3 | Biophysical characterization of TF domain construct dimerizations.**

Measurements were performed in sample buffer at 6 °C. **(a)** SEC elution profiles plotted as normalized absorbance ( $A_{280}$ ) or normalized differential refractive index (dRI) (solid lines, left axis) and MALS apparent molecular mass (dotted lines, right axis) as a function of protein concentrations of the indicated domain constructs. **(b)** Nonlinear regression fit of the averaged molar mass as a function of the elution concentration to a monomer-dimer equilibrium<sup>3</sup>. For TF and RBD–SBD fittings are plotted for three different salt concentrations: 100 mM KCl (closed circles and black line), 250 mM KCl (closed diamonds and dark gray line) and 500 mM KCl (open circles and light gray line). **(c)** Analytical ultracentrifugation (AUC) profiles for 12  $\mu\text{M}$  TF as well as 48  $\mu\text{M}$  and 135  $\mu\text{M}$  RBD–SBD. Data are shown for three centrifugation speeds (10, 16, and 20 krpm, in purple, blue, and cyan, respectively). For each construct, all data were globally fitted to a single monomer-dimer equilibrium. Residuals are shown below.

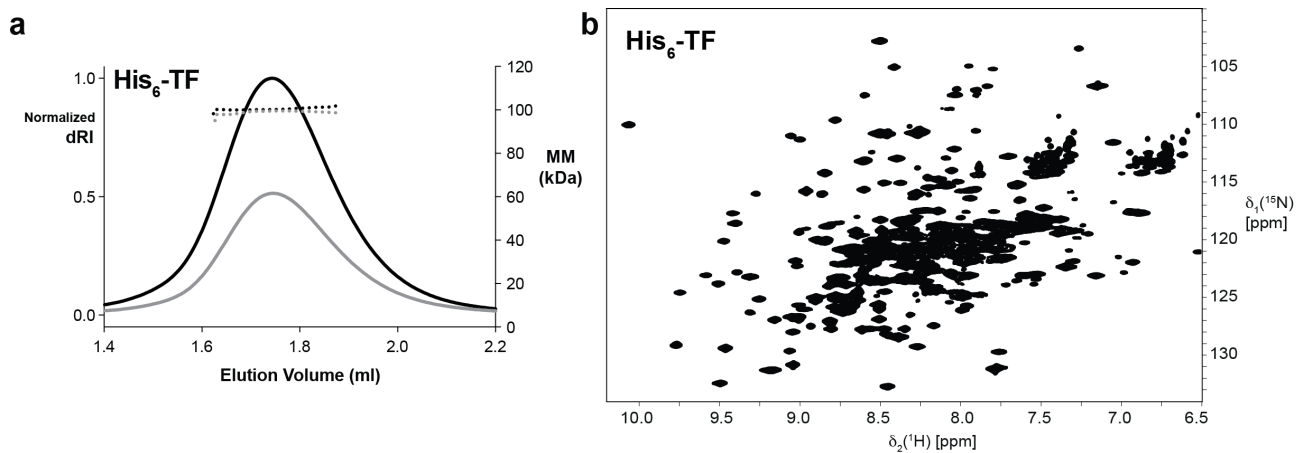

**Supplementary Figure 4 | Characterization of His<sub>6</sub>-TF.** (a) SEC elution profile plotted as normalized differential refractive index (dRI) and MALS apparent molecular mass (dotted lines, right axis) as a function of protein concentrations. Elution concentration is 20  $\mu$ M and 10  $\mu$ M for black and gray lines, respectively, showing that the dimer dissociation constant  $K_D$  must be below 100 nM. (b) 2D [<sup>15</sup>N, <sup>1</sup>H]-TROSY spectrum of 300  $\mu$ M [*U*-<sup>2</sup>H, <sup>15</sup>N] His<sub>6</sub>-TF in sample buffer (20 mM K-phosphate pH 6.5, 100 mM KCl, 0.5 mM EDTA) at 25 °C and 700 MHz.

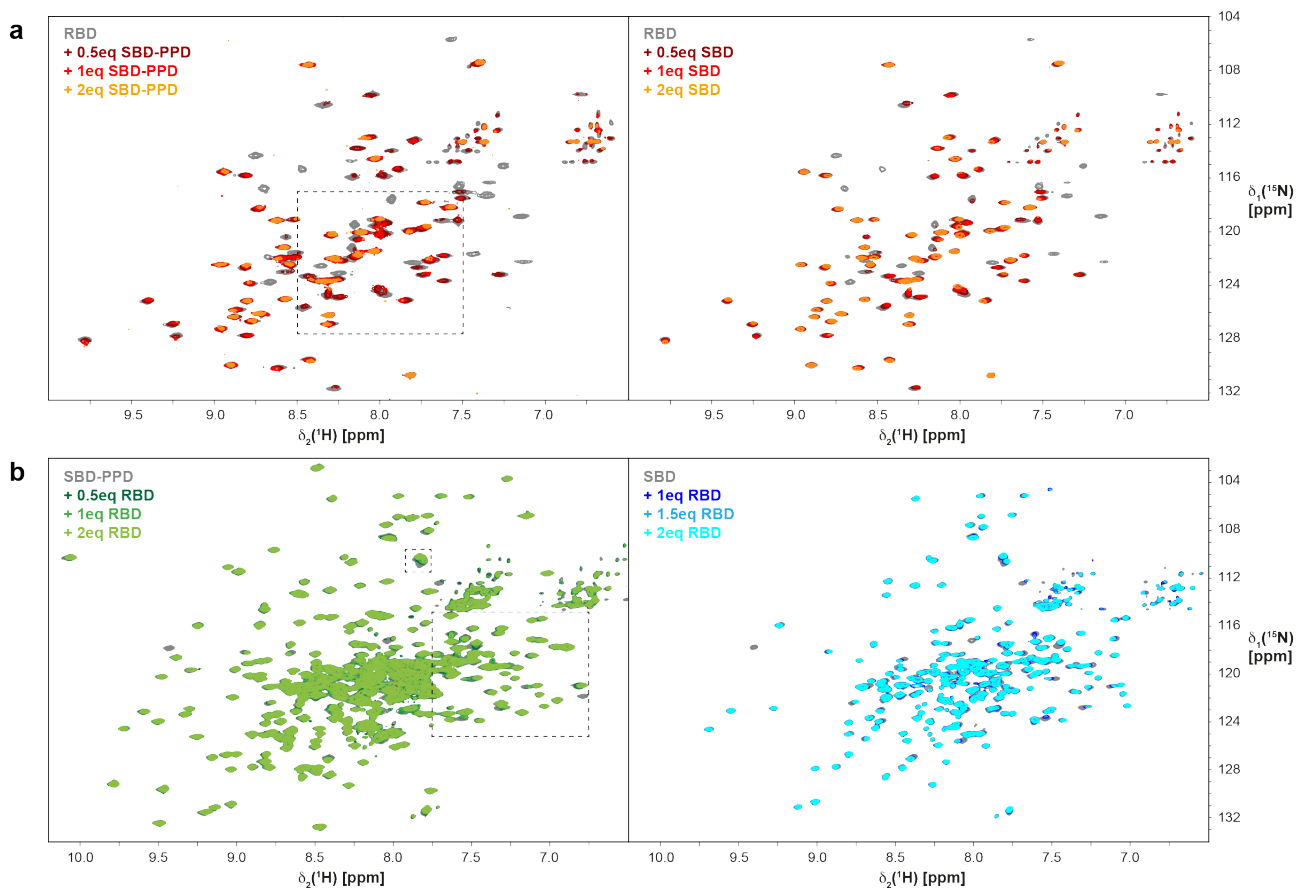

**Supplementary Figure 5 | NMR titrations of monomeric TF domains. (a)** Titration of unlabeled SBD–PPD to 100  $\mu\text{M}$  [ $U\text{-}^{15}\text{N}$ ] RBD (left) and of unlabeled SBD to 100  $\mu\text{M}$  [ $U\text{-}^{15}\text{N}$ ] RBD (right). **(b)** Titration of unlabeled RBD to 250  $\mu\text{M}$  [ $U\text{-}^2\text{H}, ^{15}\text{N}$ ] SBD–PPD and of unlabeled RBD to 100  $\mu\text{M}$  [ $U\text{-}^2\text{H}, ^{15}\text{N}$ ] SBD. The dashed rectangles correspond to the zoomed regions in Figure 3. Spectra were acquired in sample buffer (20 mM K-phosphate pH 6.5, 100 mM KCl, 0.5 mM EDTA) at 25  $^\circ\text{C}$  and 700 MHz.

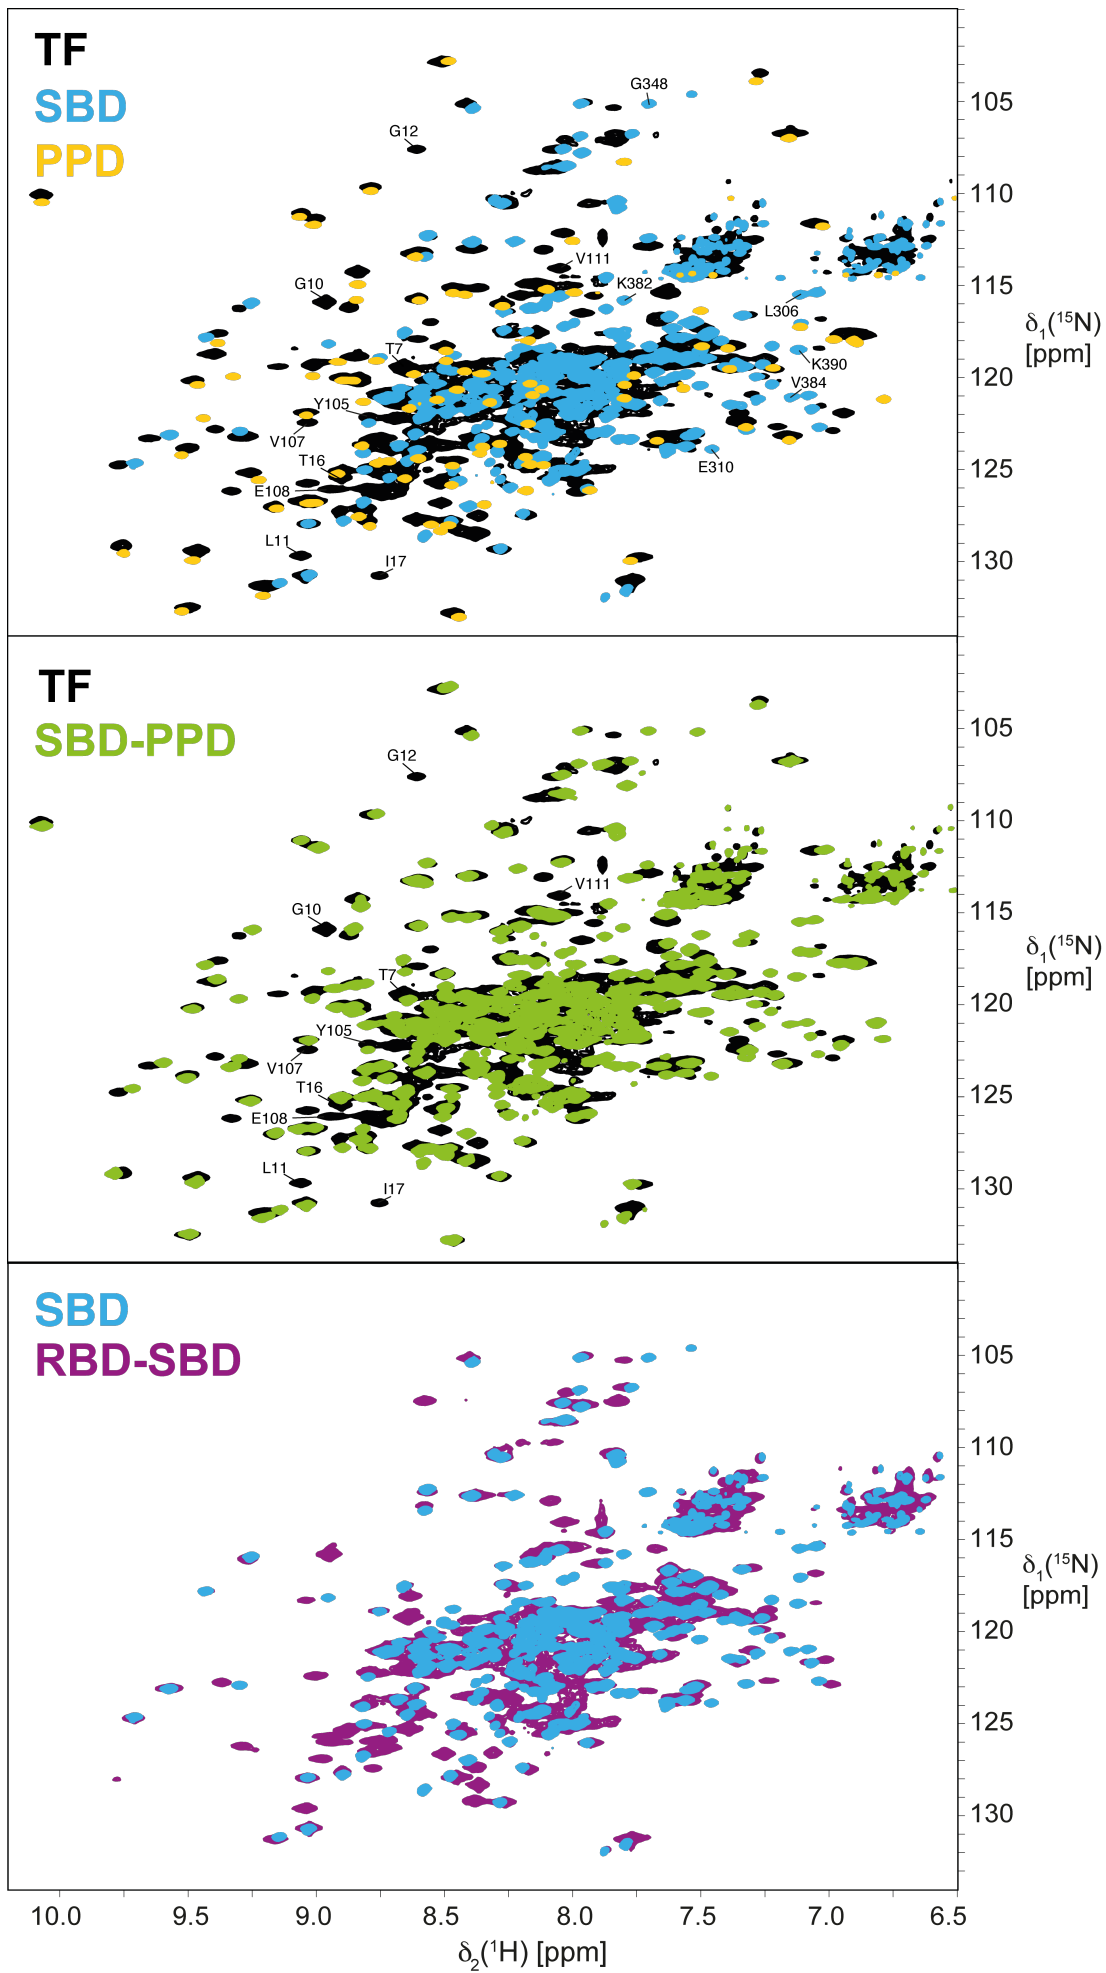

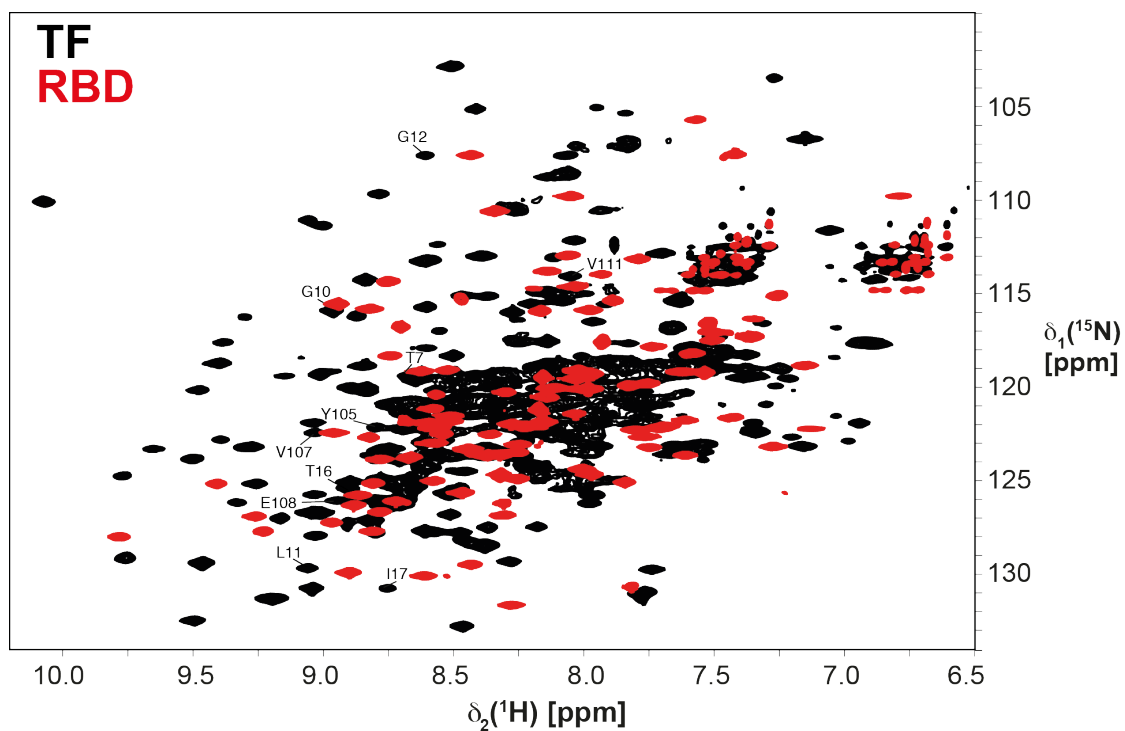

**Supplementary Figure 6 | NMR resonances of the RBD are line-broadened in full-length TF and RBD–SBD.**

Overlays of 2D  $[^{15}\text{N},^1\text{H}]$ -TROSY spectra of 500  $\mu\text{M}$   $[U\text{-}^2\text{H},^{15}\text{N}]$  TF (black),  $[U\text{-}^2\text{H},^{15}\text{N}]$  SBD (blue),  $[U\text{-}^{15}\text{N}]$  PPD (yellow),  $[U\text{-}^2\text{H},^{15}\text{N}]$  SBD–PPD (purple),  $[U\text{-}^2\text{H},^{15}\text{N}]$  RBD (red), and 250  $\mu\text{M}$   $[U\text{-}^2\text{H},^{15}\text{N}]$  SBD–PPD (green). The spectra were acquired in sample buffer (20 mM K-phosphate pH 6.5, 100 mM KCl, 0.5 mM EDTA) at 25 °C and 700 MHz. Only 16 out of 108 expected RBD resonances are observed in full-length TF. Ten of these 16 resonances could be unambiguously assigned by comparison with the spectrum of the isolated RBD, together with the 3D TROSY HNCACB for  $[U\text{-}^2\text{H},^{15}\text{N},^{13}\text{C}]$ -TF. Several resonances of the SBD are line-broadened in TF full length, but not in the isolated SBD. The assignment of five of these resonances are indicated in the overlay of SBD / TF.

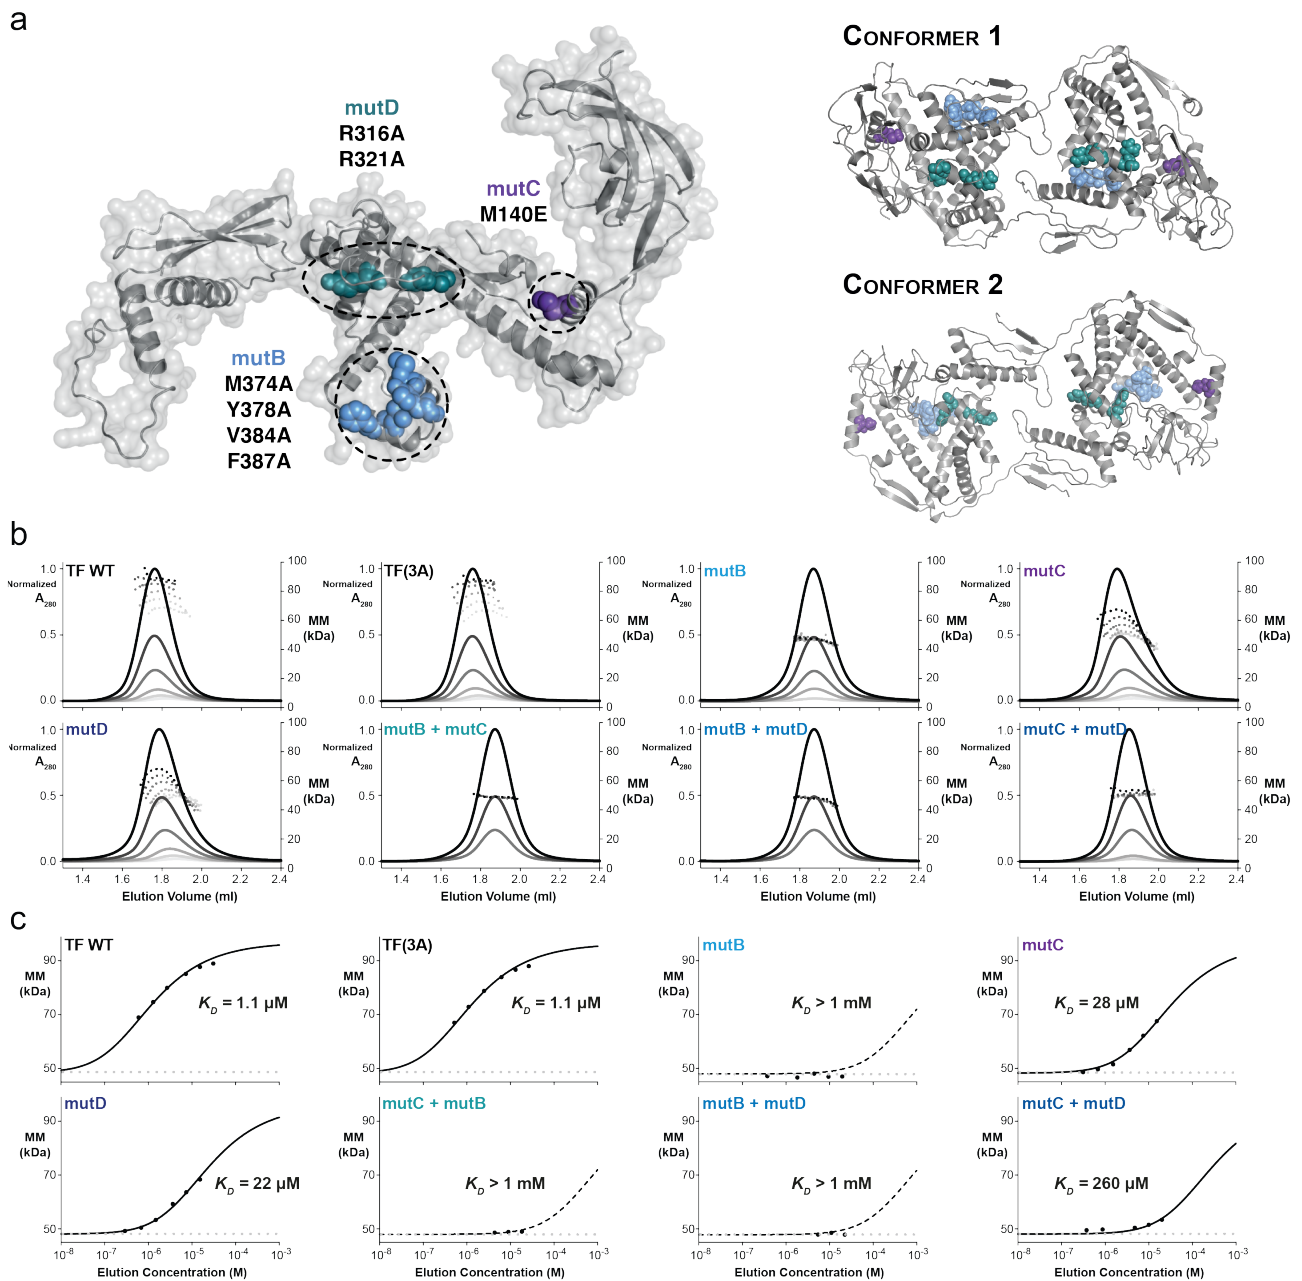

**Supplementary Figure 7 | Validation of the TF dimer structure by mutagenesis.** (a) Location of the mutation sets mutB, mutC, and mutD on the TF crystal structure (PDB 1W26) and conformers 1 and 2 of the TF dimer. (b) Biophysical characterization of TF mutants. Measurements were performed in sample buffer at 26°C. SEC elution profiles plotted as normalized absorbance ( $A_{280}$ ) (solid lines, left axis) and MALS apparent molecular mass (dotted lines, right axis) as a function of protein concentrations of the indicated mutants. (c) Nonlinear regression fit of the averaged molar mass as a function of the elution concentration to a monomer-dimer equilibrium.



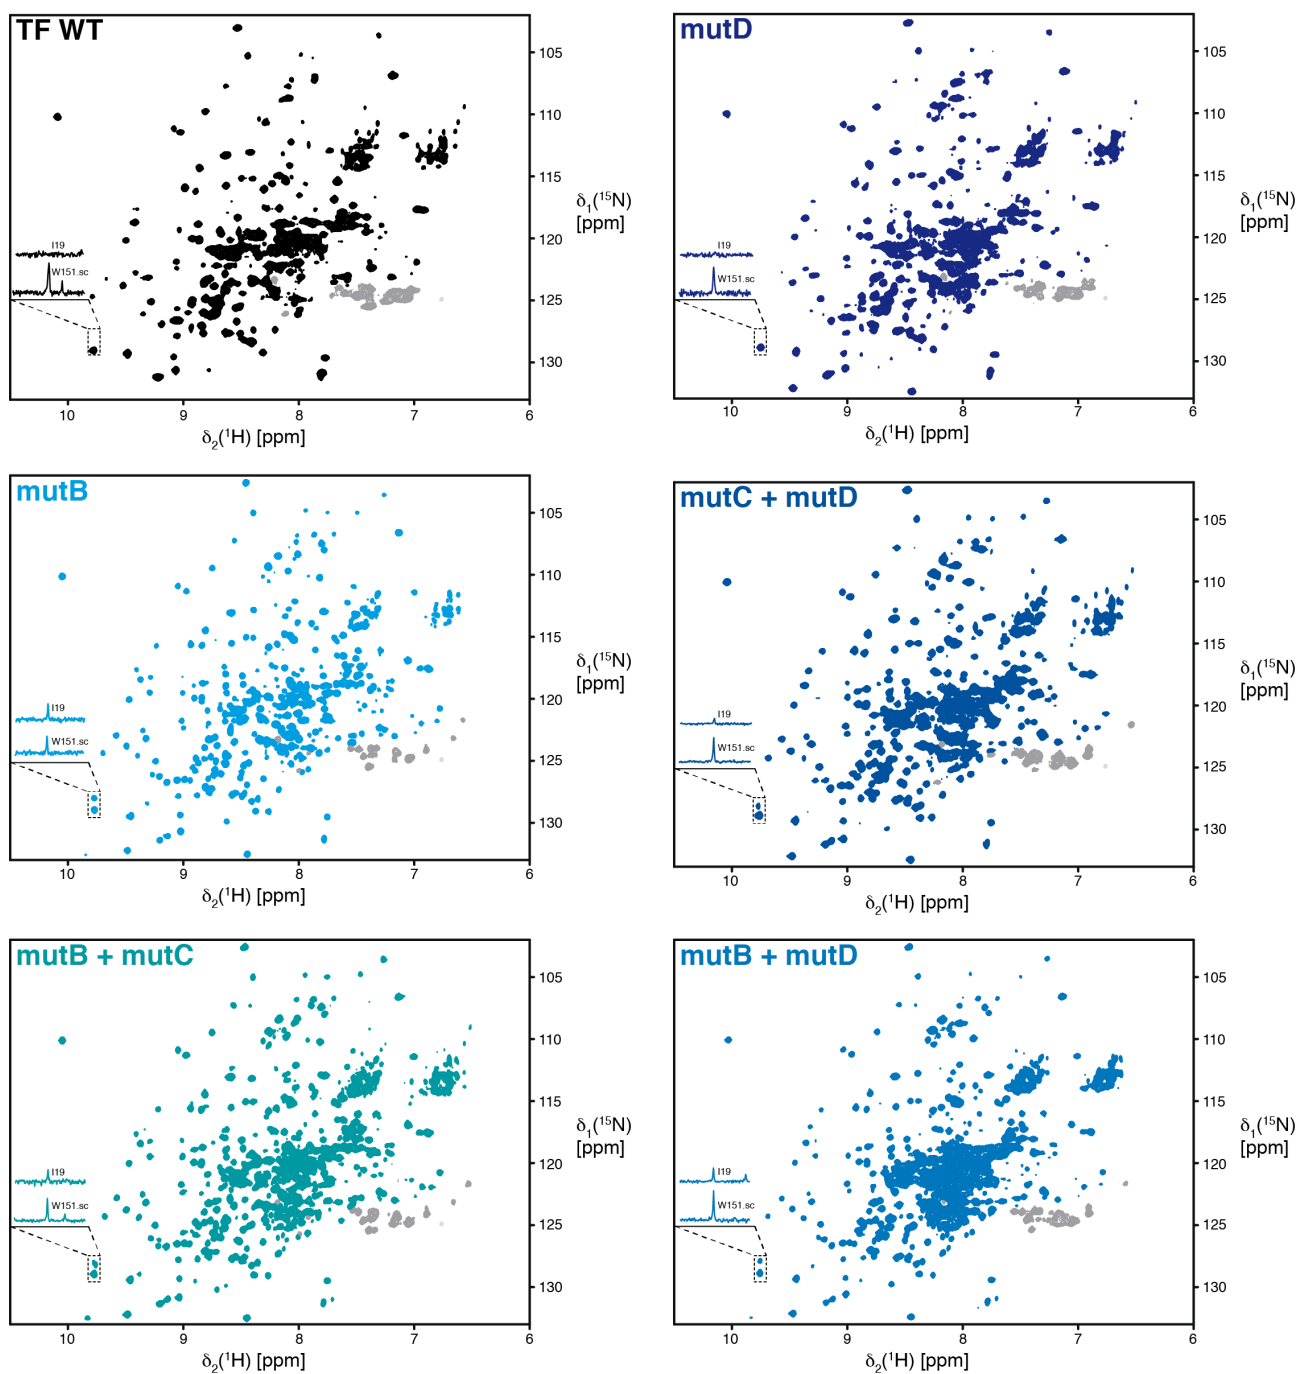

**Supplementary Figure 8 | Mutations at the dimer interface lower TF dimerization  $K_D$ .** 2D [ $^{15}\text{N}$ ,  $^1\text{H}$ ]-TROSY spectrum of 200  $\mu\text{M}$  [ $U$ - $^2\text{H}$ ,  $^{15}\text{N}$ ] TF and mutants acquired in sample buffer (20 mM K-phosphate pH 6.5, 100 mM KCl, 0.5 mM EDTA) at 25  $^\circ\text{C}$  and 700 MHz. In each spectrum a 1D-trace corresponding to W151 side-chain and to I19 is shown. The mutations lower the affinity between the protomers and peaks corresponding to residues that belong to the RBD become visible in the spectra.

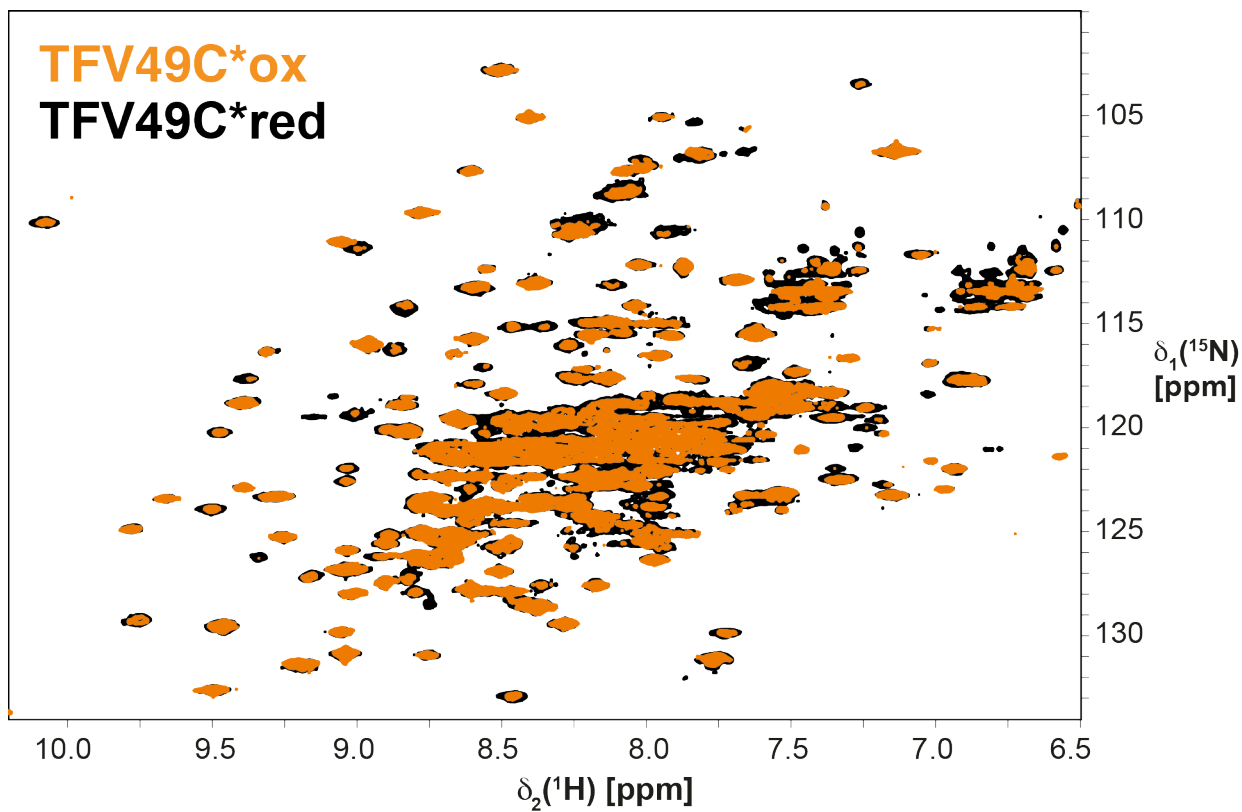

**Supplementary Figure 9 | Measurement of paramagnetic relaxation enhancement.** Overlay of 2D [ $^{15}\text{N}$ ,  $^1\text{H}$ ]-TROSY spectra of 300  $\mu\text{M}$  [ $U\text{-}^2\text{H}$ ,  $^{15}\text{N}$ ] TF(V49C), spin labeled with MTSL in the paramagnetic oxidized state (orange) and the diamagnetic reduced state (black). Spectra were recorded in sample buffer (20 mM K-phosphate pH 6.5, 100 mM KCl, 0.5 mM EDTA) at 25  $^\circ\text{C}$  and 700 MHz.

## Supplementary Tables

Supplementary Table 1 | Interaction matrix of TF domain constructs<sup>a</sup>:

|         | RBD  | SBD  | PPD  | SBD-PPD | RBD-SBD | TF   |
|---------|------|------|------|---------|---------|------|
| RBD     | -    | +    | -    | +       | n.d.    | n.d. |
| SBD     | +    | -    | -    | -       | n.d.    | n.d. |
| PPD     | -    | -    | -    | -       | n.d.    | n.d. |
| SBD-PPD | +    | -    | -    | -       | n.d.    | n.d. |
| RBD-SBD | n.d. | n.d. | n.d. | n.d.    | +       | n.d. |
| TF      | n.d. | n.d. | n.d. | n.d.    | n.d.    | +    |

<sup>a</sup>Diagonal entries were determined by SEC-MALS and AUC (Table 1) and off-diagonal entries by NMR spectroscopy. (+) = detectable interaction; (-) = no interaction detected; n.d. = not determined

**Supplementary Table 2 | Input parameters for HADDOCK docking and output parameters for the two structural clusters with highest ranks.**

| <b>HADDOCK input parameters</b>                    |                  |                  |
|----------------------------------------------------|------------------|------------------|
| <i>Number of active residues<sup>a</sup></i>       |                  |                  |
| Molecule A <sup>b</sup>                            |                  | 38               |
| Molecule B <sup>c</sup>                            |                  | 64               |
| <i>Symmetry restraints</i>                         |                  | 432              |
| <b>HADDOCK output</b>                              |                  |                  |
|                                                    | <i>Cluster 1</i> | <i>Cluster 2</i> |
| HADDOCK score                                      | -153.7 ± 12.3    | -118.2 ± 16.4    |
| Cluster size                                       | 9                | 22               |
| Average pairwise backbone RMSD within the cluster  | 0.94 ± 0.34      | 0.47 ± 0.12      |
| Backbone RMSD between the lowest-energy structures | 15.8             |                  |

<sup>a</sup> residues for which significant line-broadening or significant chemical shift perturbation was observed upon interaction

<sup>b</sup> active residues on RBD

<sup>c</sup> active residues on SBD

Supplementary Table 3 | Input data for structure refinement with XPLOR-NIH.

| Constraint type      | Amount                                                                         |                                                                             |
|----------------------|--------------------------------------------------------------------------------|-----------------------------------------------------------------------------|
| <i>EFN restraint</i> | 3116/monomer                                                                   |                                                                             |
| <i>PRE restraint</i> | <i>Intra- or intermolecular<br/>A-A, B-B or A-B, B-A<br/>(medium distance)</i> | <i>Intra- and intermolecular<br/>A-A, B-B, A-B, B-A<br/>(long distance)</i> |
| S30C                 | 6                                                                              | 95                                                                          |
| V49C                 | 63                                                                             | 32                                                                          |
| S61C                 | 51                                                                             | 32                                                                          |
| S72C                 | 10                                                                             | 75                                                                          |
| A223C                | 27                                                                             | 45                                                                          |
| E326C                | 14                                                                             | 71                                                                          |
| <b>Total</b>         | <b>171</b>                                                                     | <b>350</b>                                                                  |

**Supplementary Table 4 | XPLOr-NIH structural statistics.**

| <b>XPLOr-NIH output</b>                                       | <i>Conformer 1</i> | <i>Conformer 2</i> |
|---------------------------------------------------------------|--------------------|--------------------|
| <i>Structure statistics</i> <sup>a</sup>                      |                    |                    |
| Intramolecular restraints                                     | 42                 | 44                 |
| Intermolecular restraints                                     | 129                | 127                |
| <i>Violations long-distance PRE restraints</i> <sup>a</sup>   |                    |                    |
| Number of violations (>0.5 Å)                                 |                    |                    |
| Intramolecular                                                | 1                  | 0                  |
| Intermolecular                                                | 4                  | 1                  |
| Average violations (Å)                                        |                    |                    |
| Intramolecular                                                | 2.64               | -                  |
| Intermolecular                                                | 1.42 ± 0.75        | 0.57               |
| Max. PRE distance constraint violation (Å)                    |                    |                    |
| Intramolecular                                                | 2.64               | -                  |
| Intermolecular                                                | 2.47               | 0.57               |
| <i>Violations medium-distance PRE restraints</i> <sup>a</sup> |                    |                    |
| Number of violations (>0.5 Å)                                 |                    |                    |
| Intramolecular                                                | 14                 | 16                 |
| Intermolecular                                                | 33                 | 29                 |
| Average violations (Å)                                        |                    |                    |
| Intramolecular                                                | 1.52 ± 0.97        | 1.80 ± 1.03        |
| Intermolecular                                                | 1.90 ± 1.25        | 1.63 ± 1.01        |
| Max. PRE distance constraint violation (Å)                    |                    |                    |
| Intramolecular                                                | 3.21               | 4.43               |
| Intermolecular                                                | 5.17               | 4.97               |
| <i>Deviations from idealized geometry</i> <sup>a</sup>        |                    |                    |
| Bond lengths (Å)                                              | 0.005              | 0.005              |
| Bond angles (°)                                               | 0.539              | 0.572              |
| Impropers (°)                                                 | 0.841              | 0.965              |
| <i>Ramachandran analysis</i> <sup>b</sup>                     |                    |                    |
| Most favored regions (%)                                      | 90.8               | 86.6               |
| Additional allowed regions (%)                                | 7.6                | 9.9                |
| Generously allowed regions (%)                                | 1.0                | 1.6                |
| Disallowed regions (%)                                        | 0.5                | 1.9                |
| <i>Average pairwise rmsd (Å)</i> <sup>c</sup>                 |                    |                    |
| Heavy atoms                                                   | 2.13 ± 0.73        | 1.74 ± 0.79        |
| Backbone atoms                                                | 2.04 ± 0.74        | 1.66 ± 0.79        |

<sup>a</sup> Calculated for the lowest energy structures

<sup>b</sup> Calculated with PROCHECK-NMR for the ensemble of the 10 lowest energy structures

<sup>c</sup> Pairwise rmsd calculated with PyMOL between the 10 lowest energy structures

Supplementary Table 5 | Dimer dissociation constants of TF mutants.

| Mutant sets <sup>a</sup> | $K_D$ ( $\mu M$ ) |
|--------------------------|-------------------|
| –                        | $1.1 \pm 0.2$     |
| mutB                     | > 1000            |
| mutC                     | $28 \pm 4$        |
| mutD                     | $22 \pm 3$        |
| mutD + mutC              | $260 \pm 130$     |
| mutB + mutC              | > 1000            |
| mutB + mutD              | > 1000            |

<sup>a</sup> introduced on the TF(3A) background

**Supplementary Table 6 | Primer sequences used for cloning.**

| <b>Primer</b>       | <b>Sequence</b>                                               |
|---------------------|---------------------------------------------------------------|
| TF_fw               | GGAATTCCATATGCAAGTTTCAGTTGAAACC                               |
| TF_rev              | ACACGCGGCCGCTTACGCCTCTGGTTCATCAGC                             |
| TF_117_Stop_fw      | CCGGAAGTTGAACTGTAGGGTCTGGAAGCGA                               |
| TF_117_Stop_rev     | TCGCTTCCAGACCCTACAGTTCAACTTCCGG                               |
| TF_RF_114fw         | GGTGCCGCGCGGCAGCCATATGGAAGTTGAACTGCAGGGTCT                    |
| TF_RF_432rev        | GGTGCTCGAGTGCGGCCGCTTACGCCTGCTGGTTCATCAG                      |
| TF_RF_fw            | GTGCCGCGCGGCAGCCATATGCAAGTTTCAGTTGAAACCAC                     |
| TF_RF_149rev        | GGTGGTGGTGGTGGTGTCTCGAGCTGCTGTTTACGCAGAGTATCC                 |
| TF_RF_149/249_fw    | CGGCATGCTGGATACTCTGCGTAAACAGCAGGAACTGACTGCAGAATTCATCAA        |
| TF_RF_149fw         | GGTGCCGCGCGGCAGCCATATGGCGACCTGGAAGAAAAAGAC                    |
| TF_RF_249rev        | GGTGCTCGAGTGCGGCCGCTTAAGTCAGTTCCGGCAGTTC                      |
| Thr2TEV_fw          | GCCATCATCATCATCACAGCGAGAACCTATATTTCCAGGGCAGCCATATG            |
| Thr2TEV_rev         | CATATGGCTGCCCTGGAAATATAGGTTCTCGCTGTGATGATGATGATGATGGC         |
| TF_S30C_fw          | GACCAGCTCGCATTTAACAGCGGTCTCGATGCT                             |
| TF_S30C_rev         | GACCAGCTCGCATTTAACAGCGGTCTCGATGCT                             |
| TF_V49C_fw          | TTGACGGCTCCGCAAAGGCAAATGCCCAATGAATATCGTTGCTC                  |
| TF_V49C_rev         | GAGCAACGATATTCATTGGGCATTTGCCTTTGCGGAAGCCGTCAA                 |
| TF_S61C_fw          | GCGTTATGGCGCGTGTGTACGCCAGG                                    |
| TF_S61C_rev         | CCTGGCGTACACACGCGCCATAACGC                                    |
| TF_S72C_fw          | TTCTGGGTGACCTGATGTGCCGTAACCTTCATTGAC                          |
| TF_S72C_rev         | GTCAATGAAGTTACGGCACATCAGGTCACCCAGAA                           |
| TF_A223C_fw         | ACCTTCCCGGAAGAATACCACTGCGAAAACCTGAAAGGTAAAGCA                 |
| TF_A223C_rev        | TGCTTACCTTTCAGGTTTTTCGAGTGGTATTCTTCCGGGAAGGT                  |
| TF_E326C_fw         | CACAGCGTTTCGGTGGCAACTGCAAACAAGCTCTGGAAGTCC                    |
| TF_E326C_rev        | GGCAGTTCAGAGCTTGTTCAGTTGCCACCGAAACGCTGTG                      |
| TF_FRK44-46_AAA_fw  | GTTGCGAAAAAAGTACGTATTGACGGCGCCGCCGAGGCAAAGTGCCAATGAATATCGTTGC |
| TF_FRK44-46_AAA_rev | GCAACGATATTCATTGGCACTTTGCCTGCGGCGGCCGCTCAATACGTACTTTTTTCGCAAC |
| TF_R321A_fw         | GCCAGGCTGCACAGGCTTTCGGTGGCAACG                                |
| TF_R321A_rev        | CGTTGCCACCGAAAGCCTGTGCAGCCTGGC                                |
| TF_R316A_fw         | GCGAAATCGACGTTTCTGCGTGCCAGGCTGCAC                             |
| TF_R316A_rev        | GTGCAGCCTGGGCACGCAGAACGTCGATTTTCGC                            |
| TF_M140E_fw         | GCTGACGTTGACGGCGAGCTGGATACTCTGCG                              |
| TF_M140E_rev        | CGCAGAGTATCCAGCTCGCCGTCAACGTCAGC                              |
| TF_V384A_F387A_fw   | GCGTACGAAGATCCGAAAGAAGCTATCGAGGCCTACAGCAAAAACAAAGAAGT         |
| TF_V384A_F387A_rev  | CAGTTCTTTGTTTTGCTGTAGGCCTCGATAGCTTCTTTCCGGATCTTCGTACGC        |
| TF_M374A_Y378A_fw   | AAGGCCTGATCGAAGAGCGGCTTCTGCGGCCGAAGATCCGAAAGAAG               |
| TF_M374A_Y378A_rev  | CTTCTTTCGGATCTTCGGCCGAGAAGCCGCTCTTCGATCAGGCCTT                |



## Supplementary Notes

### Supplementary Note 1

#### Kinetic equations for the determination of the lifetime of the TF dimer

The monomer-dimer equilibrium for the two differently labeled forms of TF is described by the following chemical equilibrium reactions

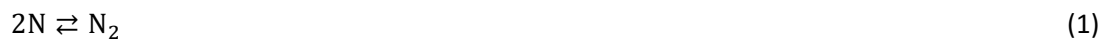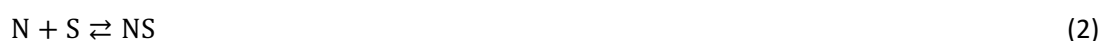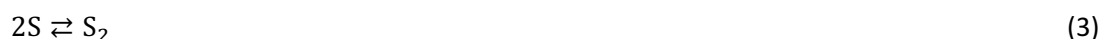

where N and S are the  $^{15}\text{N}$ -labeled and spin-labeled forms of monomeric TF, respectively. The three reactions 1–3 have the same  $k_{\text{off}}$ ,  $k_{\text{on}}$  and  $K_d$  values. The experimental conditions were chosen to have equal amounts of the two labeled forms:

$$[N]_{\text{total}} = [S]_{\text{total}} \quad (4)$$

At  $t = 0$ , equal samples of pure N and pure S are mixed and the equations hold:

$$[N_2]_0 = [S_2]_0 = c \quad \text{and} \quad [NS]_0 = 0 \quad (5)$$

The symmetry argument ( $K_d$  is the same for  $N_2$ ,  $S_2$ , and  $NS$ ) yields that at all times

$$[N_2] = [S_2] \quad (6)$$

Furthermore, symmetry considerations yield that at all times

$$[N] = [S] = \text{const} \quad (7)$$

and

$$[N_2] + [NS] + [S_2] = 2c \quad , \text{ rewritten as} \quad [NS] = 2c - 2[N_2] \quad (8)$$

After mixing of the samples, the system evolves from

$$[N_2]_0 = [S_2]_0 = c \quad \text{and} \quad [NS]_0 = 0 \quad \text{at} \quad t = 0 \quad (5)$$

to

$$[N_2]_{\text{eq}} = [S_2]_{\text{eq}} = [NS]_{\text{eq}} = \frac{2}{3}c \quad \text{at} \quad t = \infty \quad (9)$$

The rate equations for the evolution of the system from  $t = 0$  to  $t = \infty$  are given by

$$\frac{d[N_2]}{dt} = -k_{\text{off}}[N_2] + k_{\text{on}}[N]^2 \quad (10)$$

$$\frac{d[NS]}{dt} = -k_{\text{off}}[NS] + k_{\text{on}}[N][S] \quad (11)$$

combining eqs. 10 and 11 yields

$$\begin{aligned} \frac{d[N_2]}{dt} - \frac{d[NS]}{dt} &= -k_{\text{off}}[N_2] + k_{\text{off}}[NS] + k_{\text{on}}[N]^2 - k_{\text{on}}[N][S] \\ \frac{d[N_2]}{dt} - \frac{d(2c-2[N_2])}{dt} &= -k_{\text{off}}[N_2] + k_{\text{off}}[NS] + k_{\text{on}}[N]^2 - k_{\text{on}}[N][N] \\ \frac{d[N_2]}{dt} + 2\frac{d[N_2]}{dt} &= -k_{\text{off}}[N_2] + k_{\text{off}}(2c - 2[N_2]) \\ \frac{3d[N_2]}{dt} &= -k_{\text{off}}(3[N_2] - 2c) \\ \frac{3d[N_2]}{(3[N_2]-2c)} &= -k_{\text{off}}dt \\ \frac{d[N_2]}{[N_2]-\frac{2}{3}c} &= -k_{\text{off}}dt \end{aligned} \quad (12)$$

Integration yields

$$\begin{aligned} \int_c^{[N_2](t)} \frac{d[N_2]}{[N_2]-\frac{2}{3}c} &= -k_{\text{off}} \int_0^t dt \\ \ln\left([N_2](t) - \frac{2}{3}c\right) - \ln\left(c - \frac{2}{3}c\right) &= -k_{\text{off}}t \\ \ln\left(\frac{[N_2](t)-\frac{2}{3}c}{\frac{1}{3}c}\right) &= -k_{\text{off}}t \\ \frac{[N_2](t)-\frac{2}{3}c}{\frac{1}{3}c} &= \exp(-k_{\text{off}}t) \end{aligned} \quad (13)$$

With the final result

$$\begin{aligned} [N_2](t) &= \frac{1}{3}c \exp(-k_{\text{off}}t) + \frac{2}{3}c \\ [S_2](t) &= \frac{1}{3}c \exp(-k_{\text{off}}t) + \frac{2}{3}c \\ [NS](t) &= \frac{2}{3}c - \frac{2}{3}c \exp(-k_{\text{off}}t) \end{aligned} \quad (14)$$

Supplementary Figure 10 shows a numeric simulation of eqs. 14.

The observed NMR signal in the lifetime experiment is given by

$$I(t) = a_1[N_2](t) + a_2[NS](t) = \left(\frac{1}{3}a_1 - \frac{2}{3}a_2\right) \cdot c \exp(-k_{\text{off}}t) + (a_1 + a_2) \frac{2}{3}c \quad (15)$$

where  $a_1$  and  $a_2$  are the specific molar NMR intensities of the  $N_2$  and  $NS$  species, respectively. Since  $a_1$ ,  $a_2$  and  $c$  are constants, eq. 15 can be rewritten as

$$I(t) = (I_0 - I_\infty) \cdot \exp(-k_{\text{off}}t) + I_\infty \quad (16)$$

where the constants  $I_0$  and  $I_\infty$  are the signal intensities at  $t = 0$  and  $t = \infty$ , respectively. The off-rate constant  $k_{\text{off}}$  can be obtained from non-linear fits of experimental data to eq. 16 or to the equivalent form

$$I_\Delta(t) = I(t) - I_\infty = (I_0 - I_\infty) \cdot \exp(-k_{\text{off}}t) \quad (17)$$

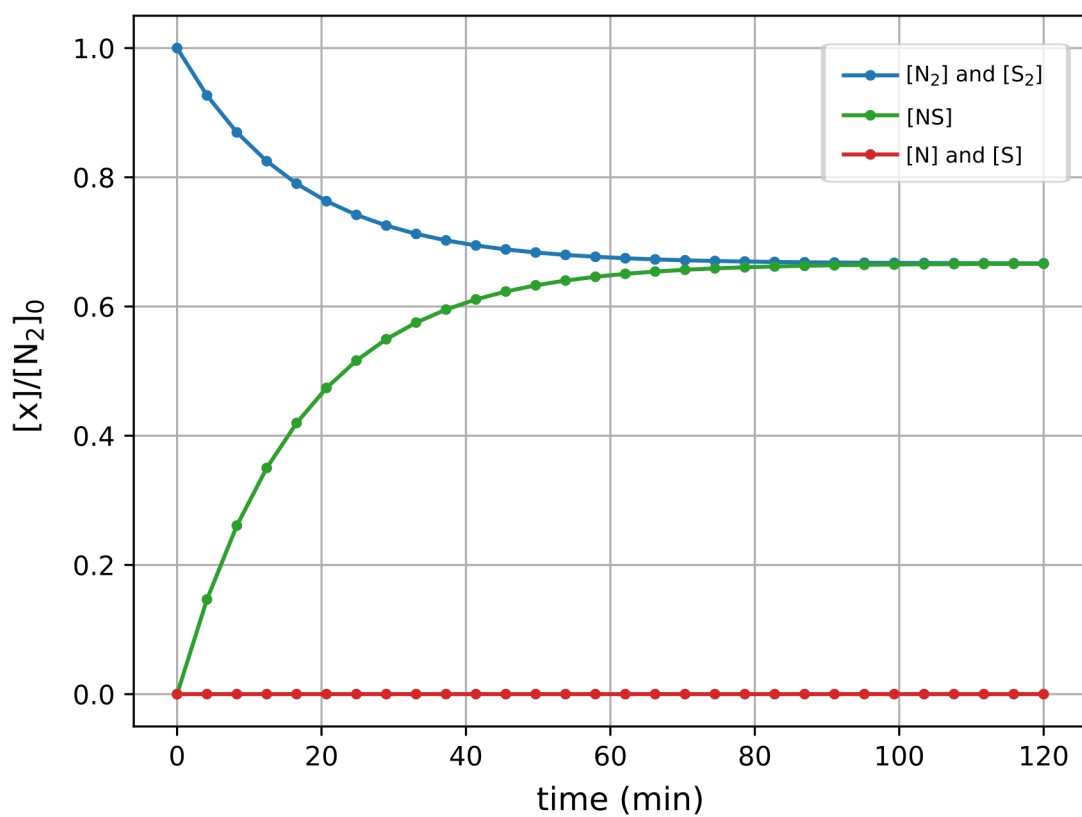

**Supplementary Figure 10** | Numerical simulation integration of equations 11 and 12 with parameters  $K_d = 2\mu\text{M}$ ,  $k_{\text{off}} = 0.001\text{ s}^{-1}$ ,  $[N]_{\text{total}} = 100\text{ }\mu\text{M}$ .

## Supplementary References

1. Hsu, S.T. & Dobson, C.M.  $^1\text{H}$ ,  $^{15}\text{N}$  and  $^{13}\text{C}$  assignments of the dimeric ribosome binding domain of Trigger Factor from *Escherichia coli*. *Biomol. NMR Assign.* **3**, 17–20 (2009).
2. Saio, T., Guan, X., Rossi, P., Economou, A. & Kalodimos, C.G. Structural basis for protein antiaggregation activity of the Trigger Factor chaperone. *Science* **344**, 1250494 (2014).
3. Benfield, C.T. *et al.* Mapping the I $\kappa$ B kinase  $\beta$  (IKK $\beta$ )-binding interface of the B14 protein, a vaccinia virus inhibitor of IKK $\beta$ -mediated activation of nuclear factor  $\kappa$ B. *J. Biol. Chem.* **286**, 20727–20735 (2011).
